# Supplementary material
Source: publisher figshare collection journal article supplement (https://rs.figshare.com/ndownloader/files/13321352)

**Figure S1.** Boxplots of water conductivity measured in river reaches in good and poor ecological status in each river typology. The mean conductivity (± the standard error) for each typology is indicated in brackets.


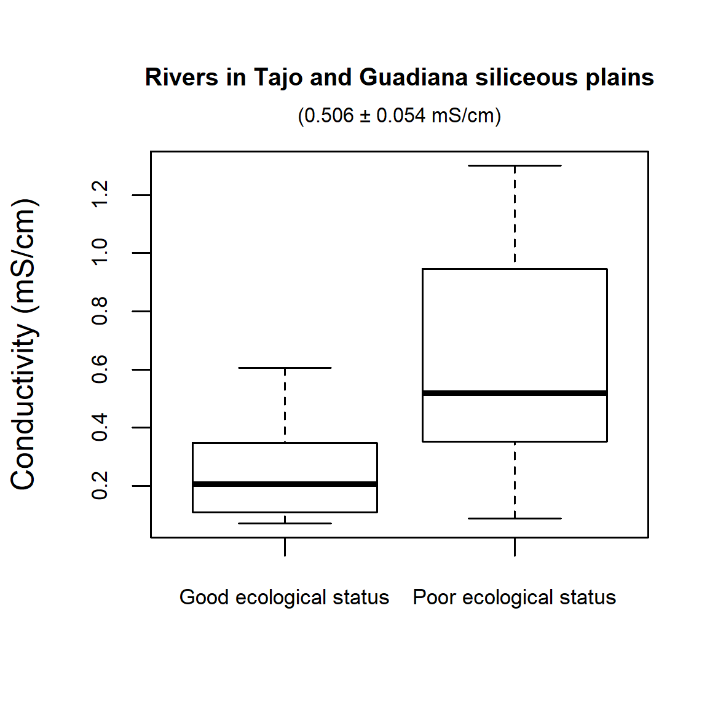

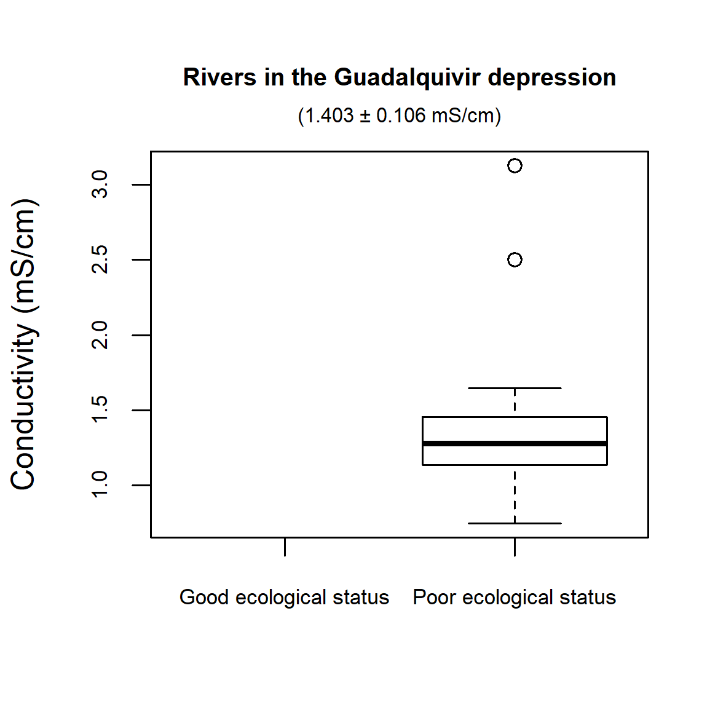


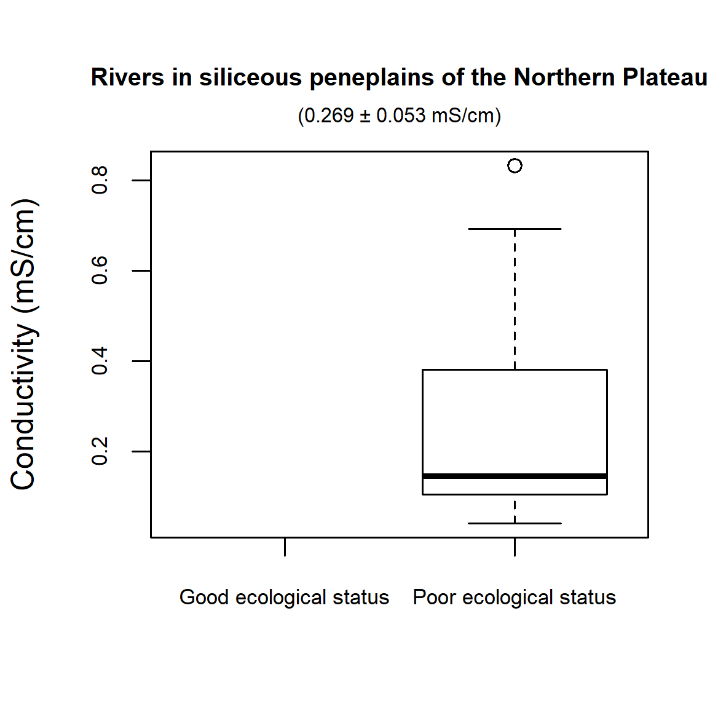

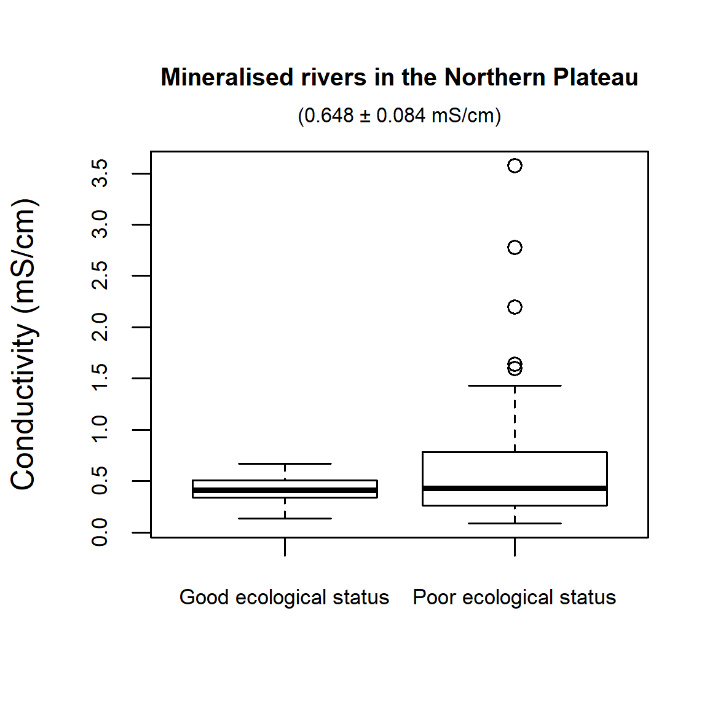


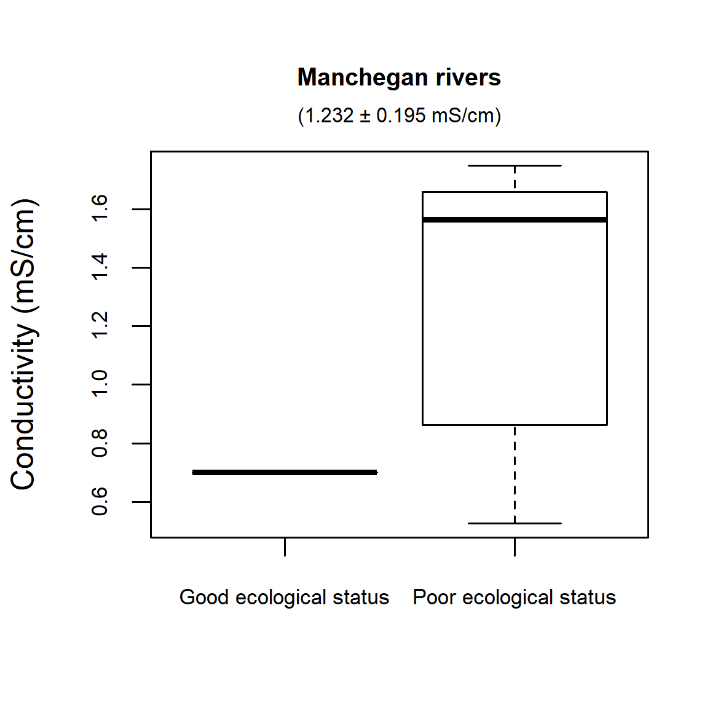

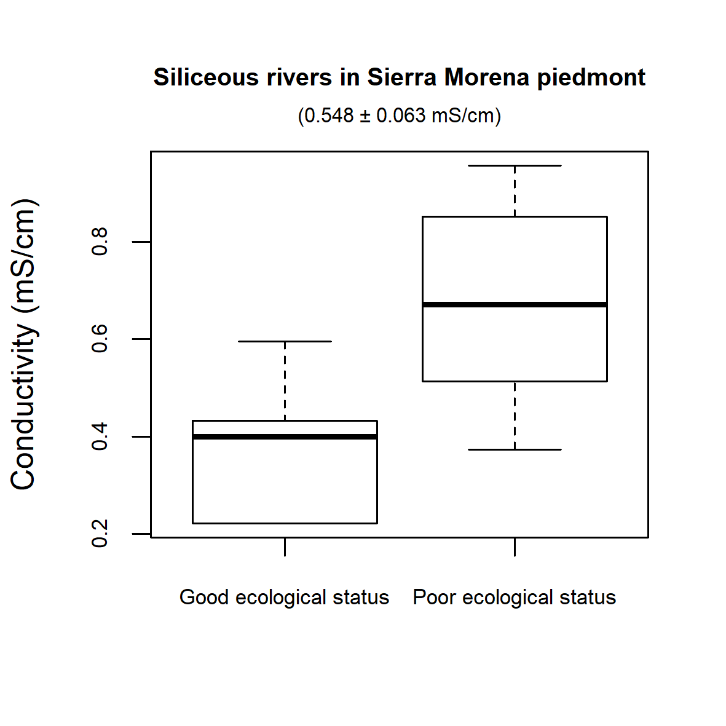


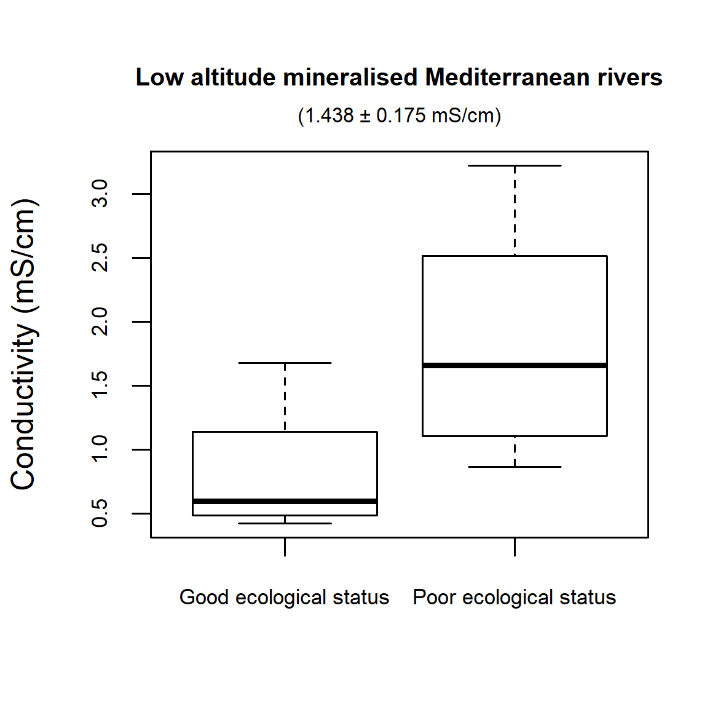

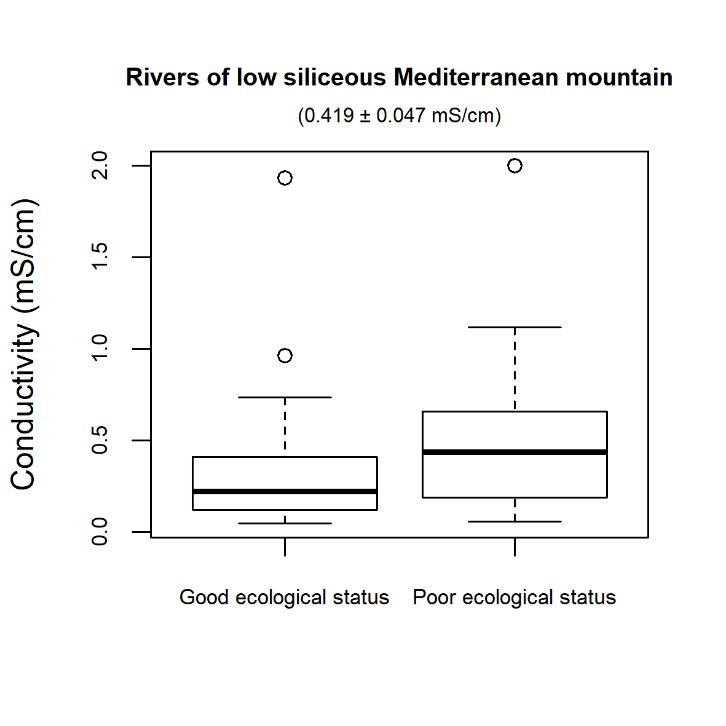


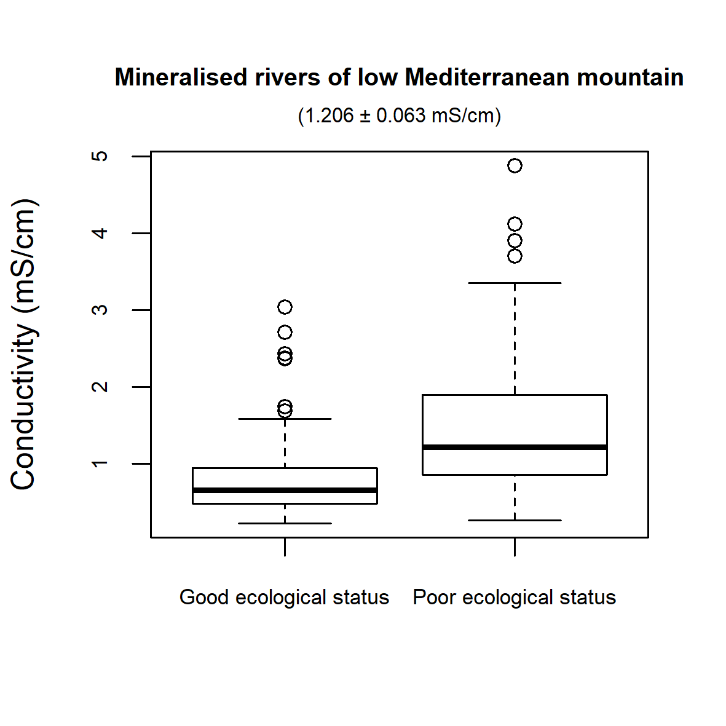

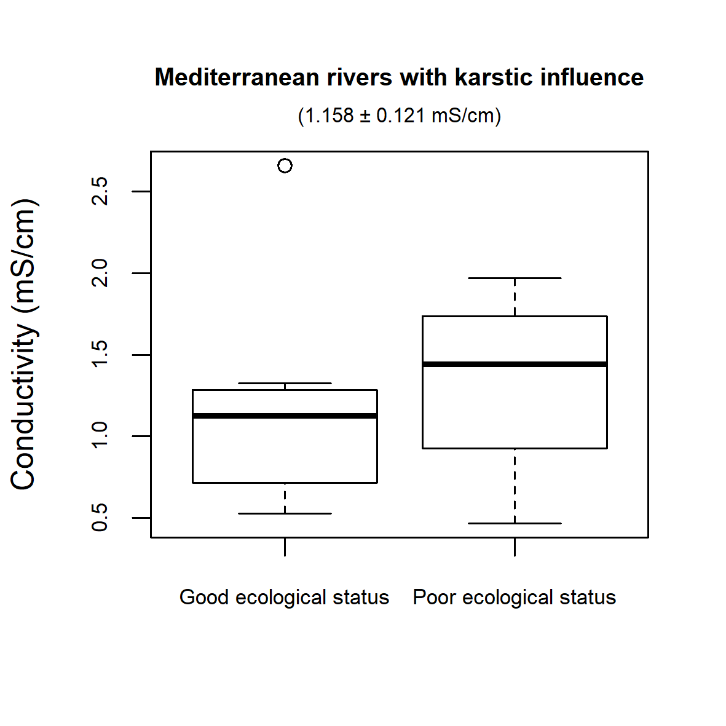


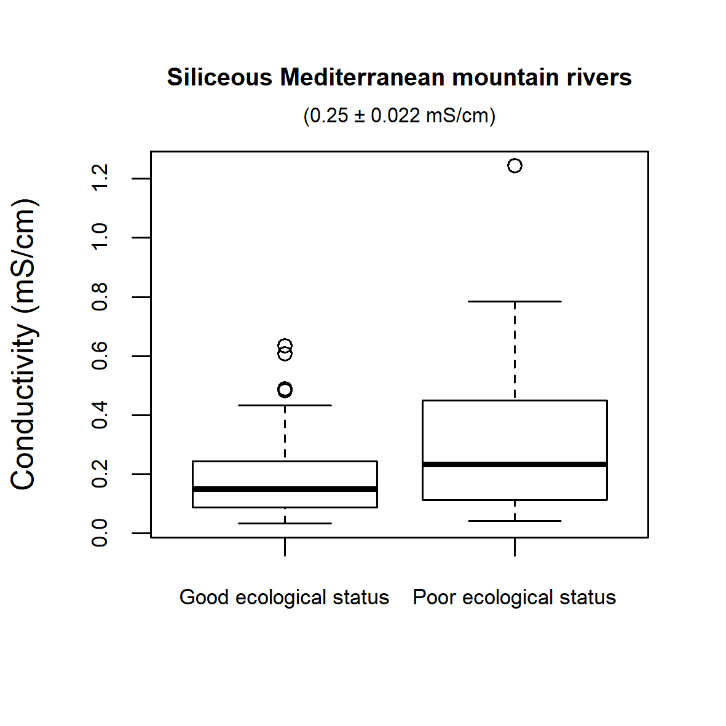

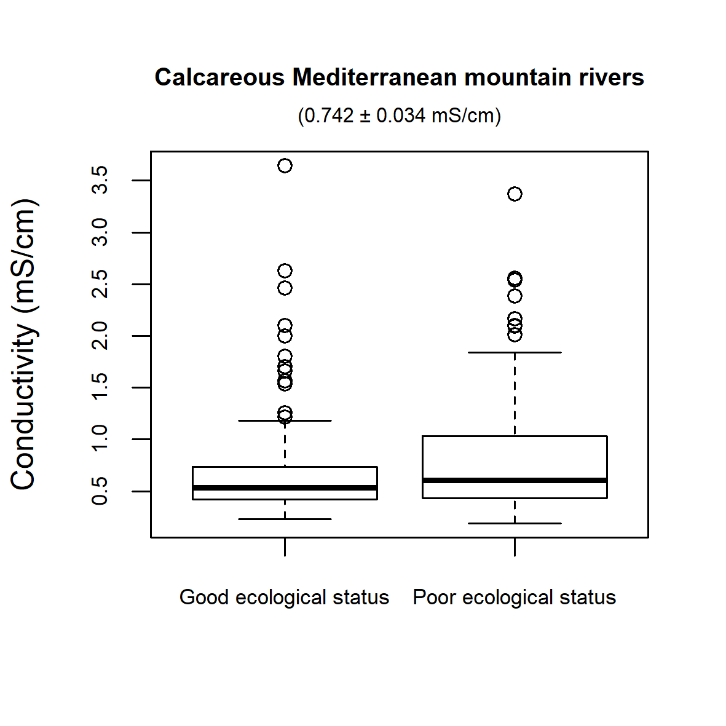


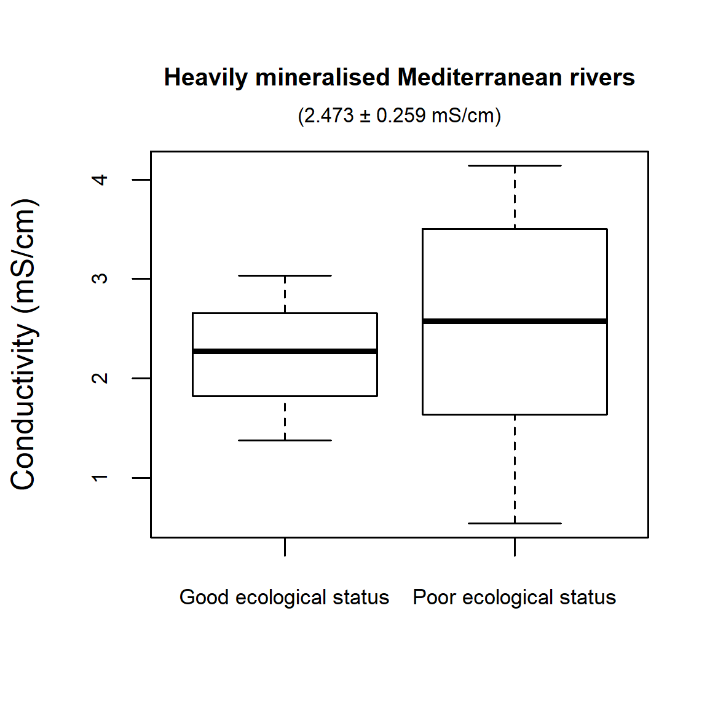

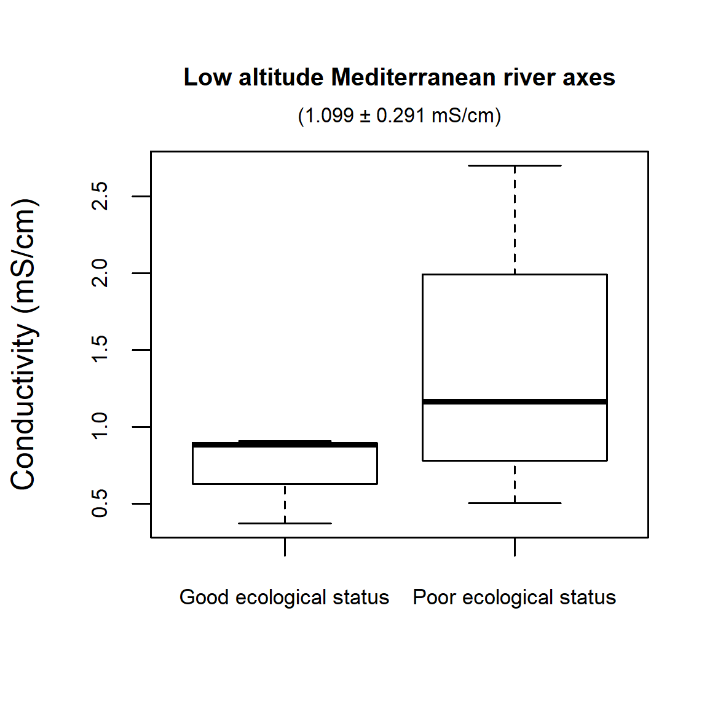


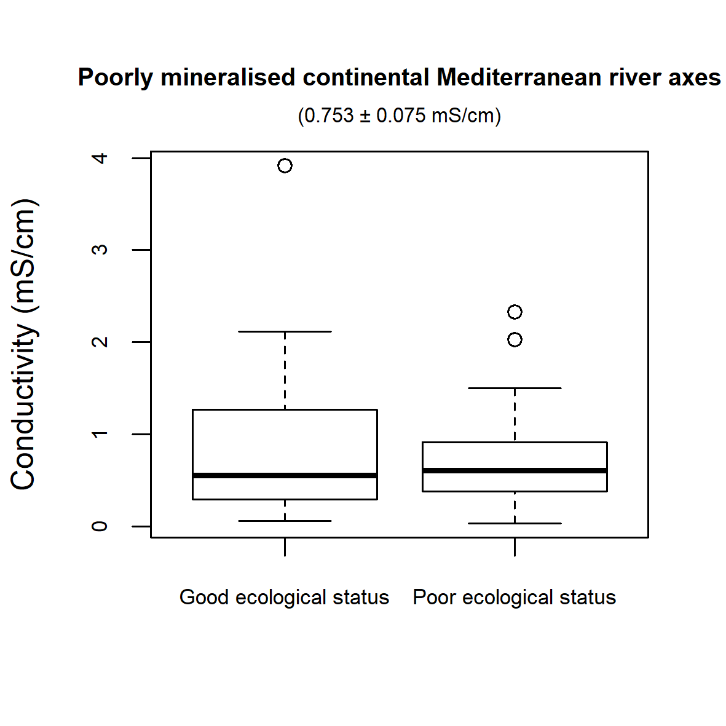

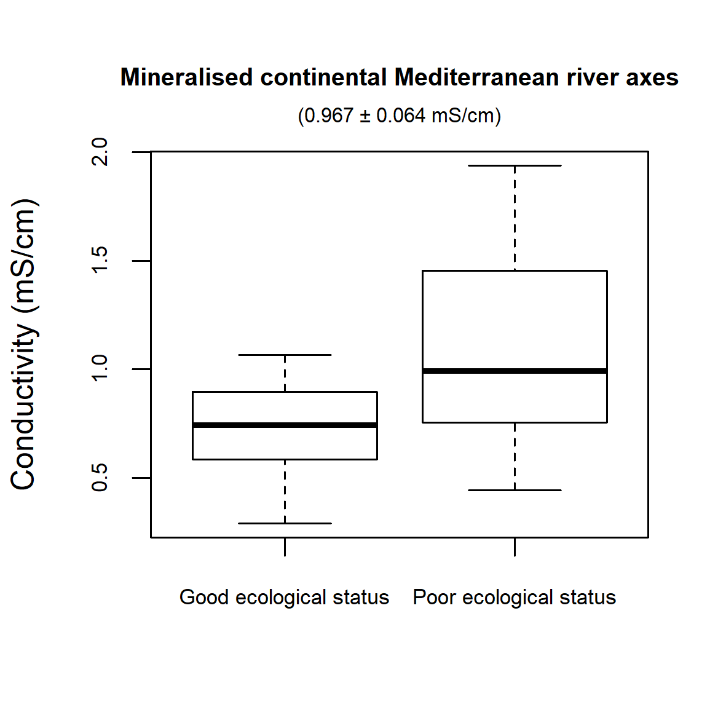


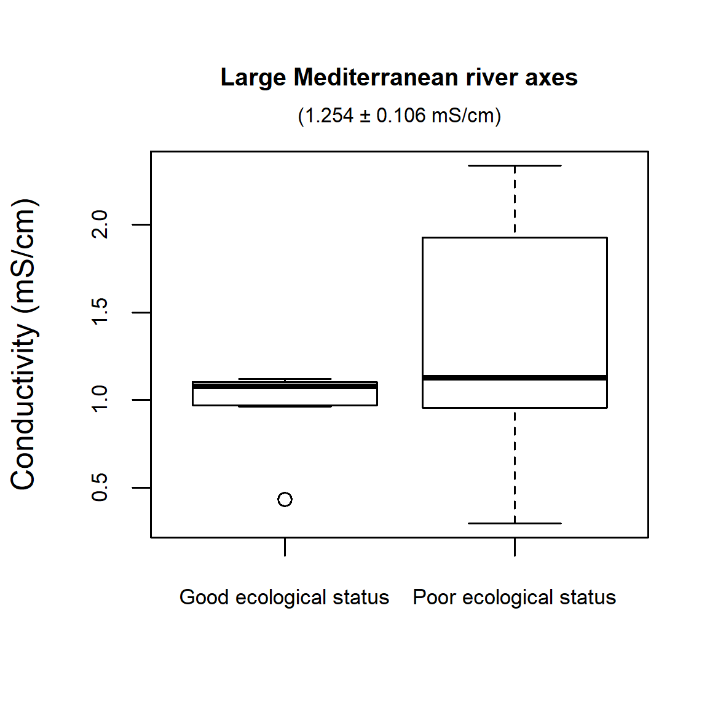

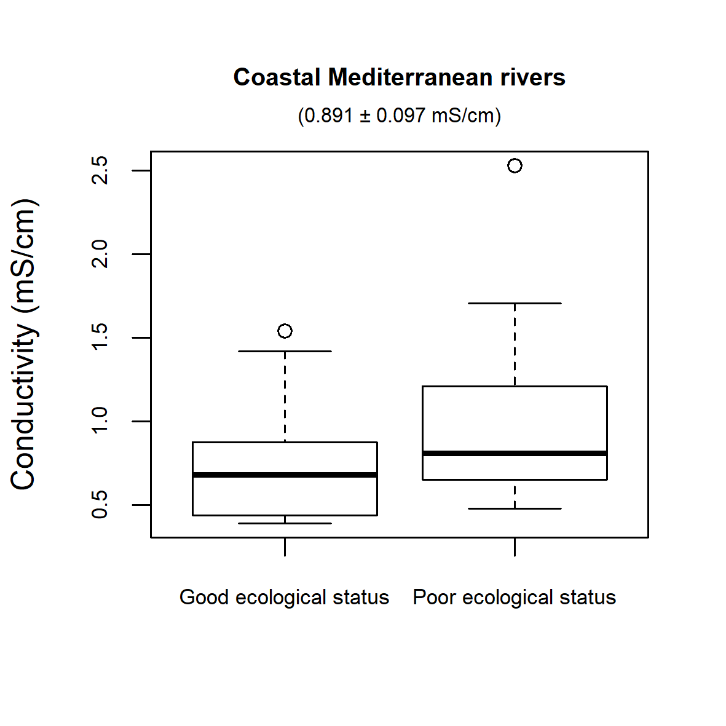


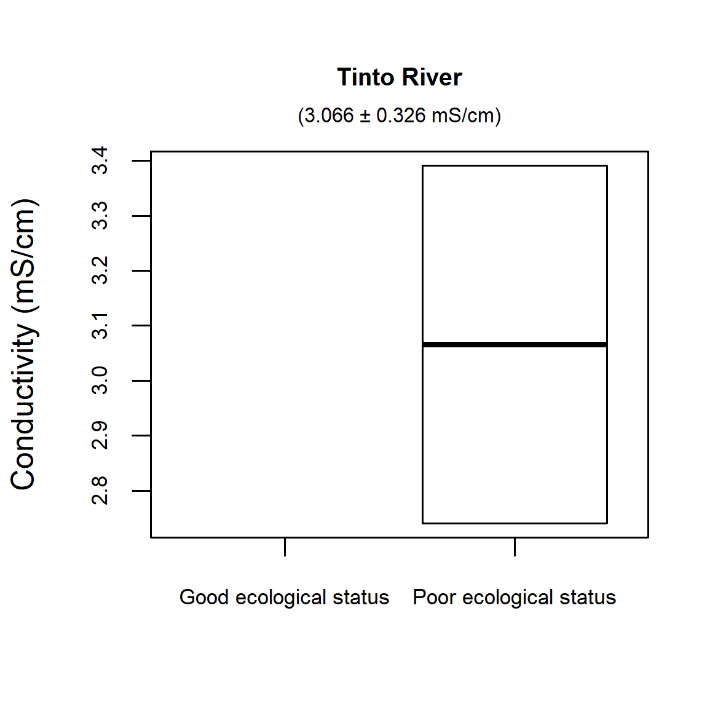

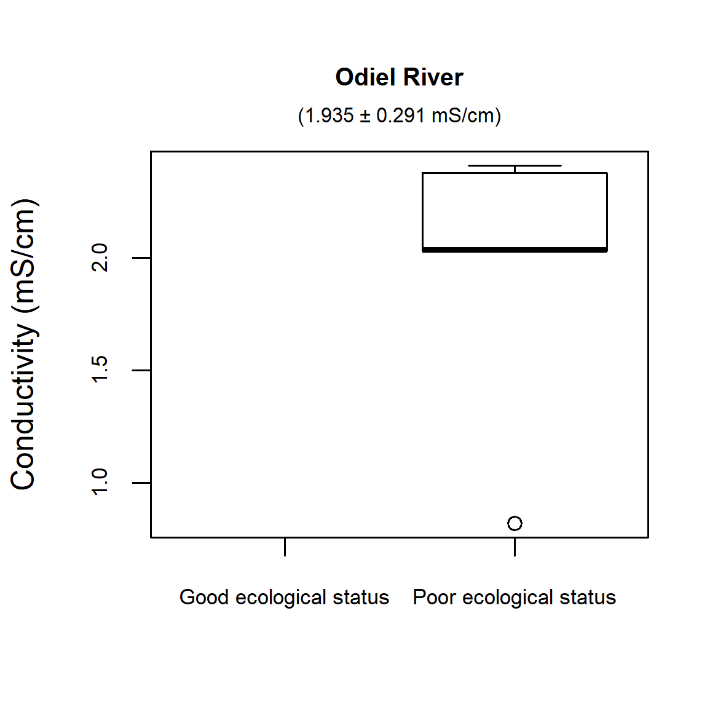


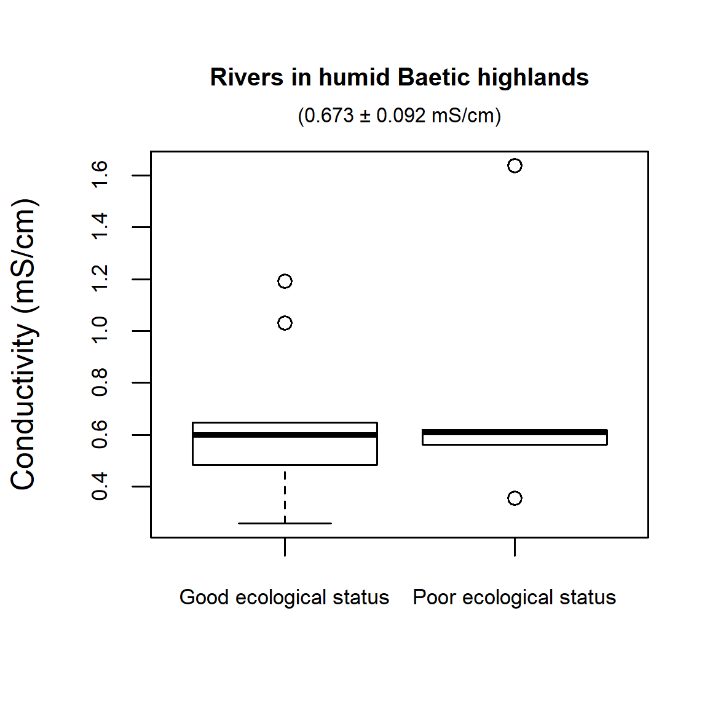

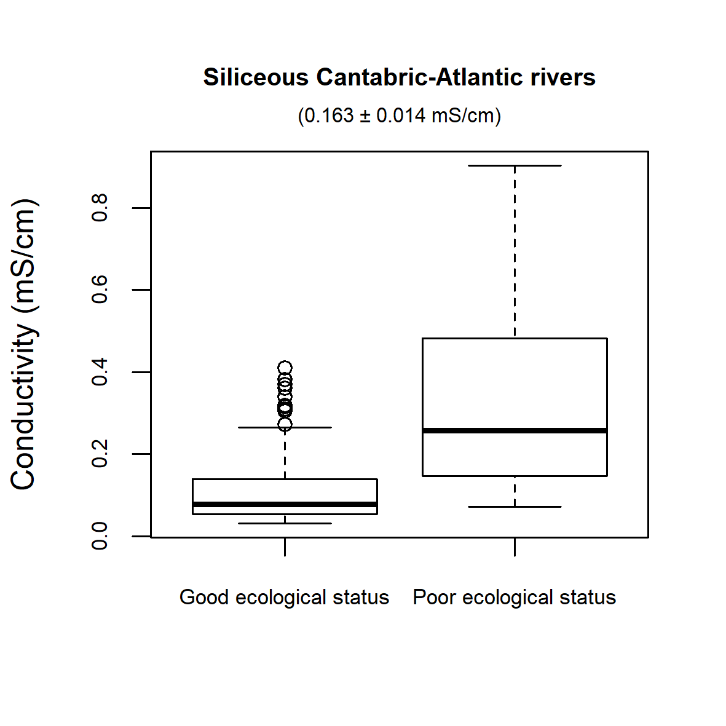


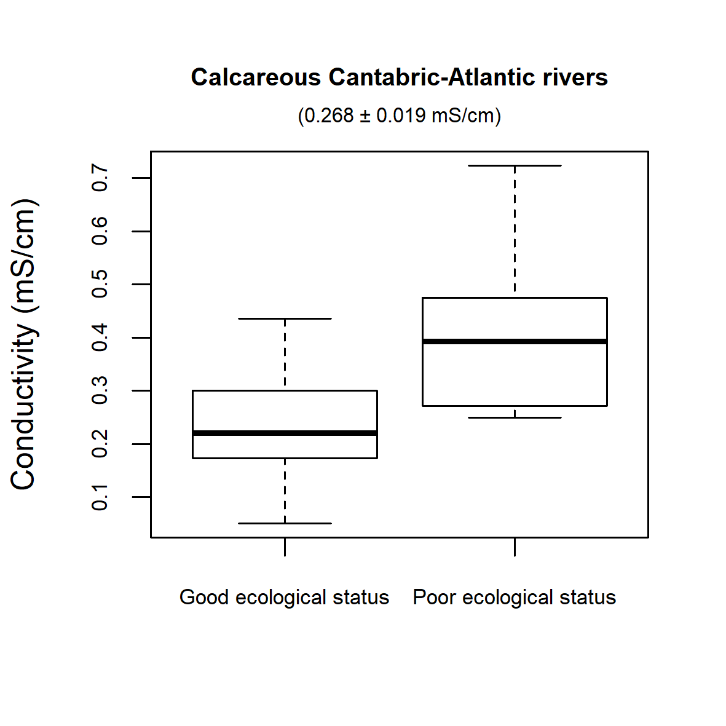

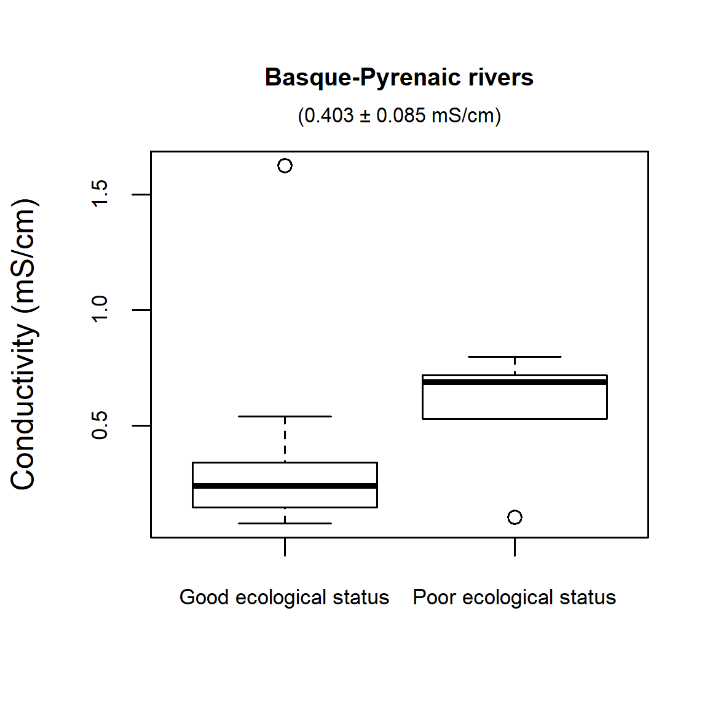


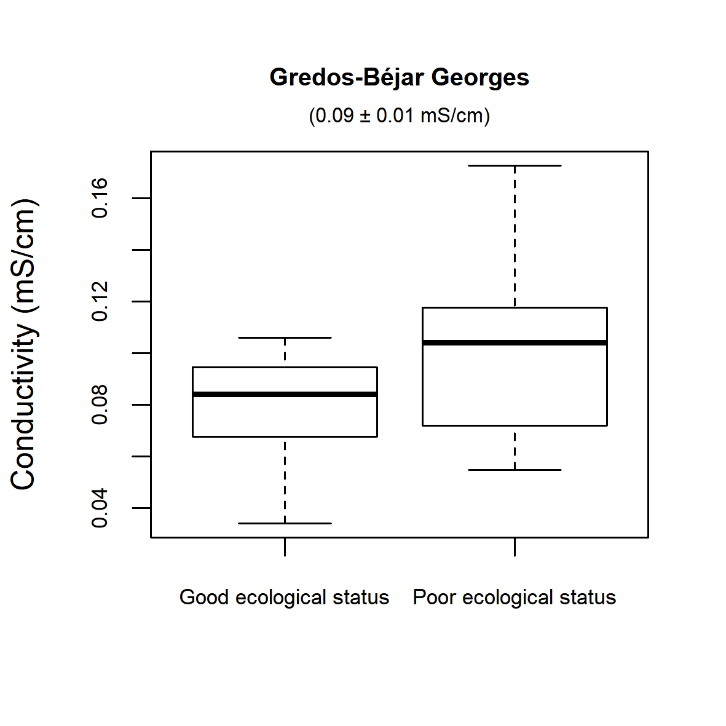

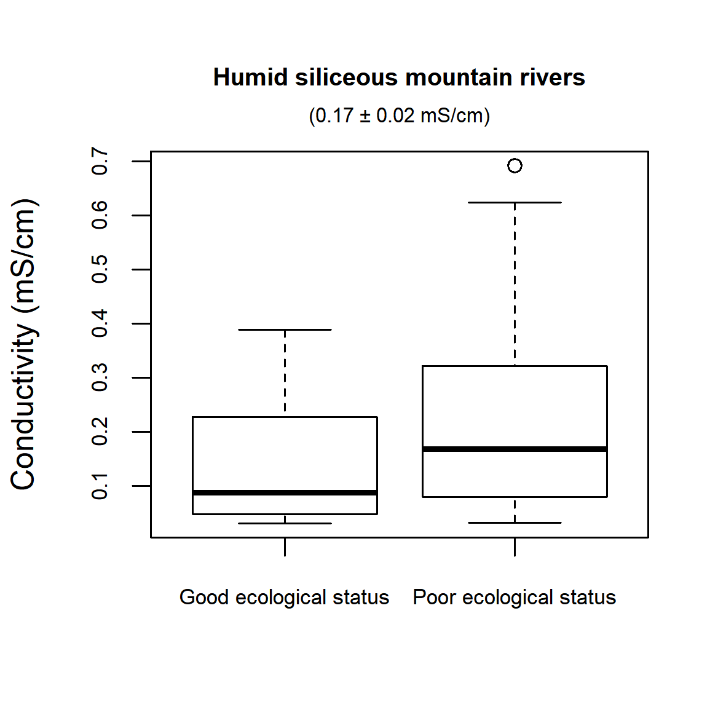


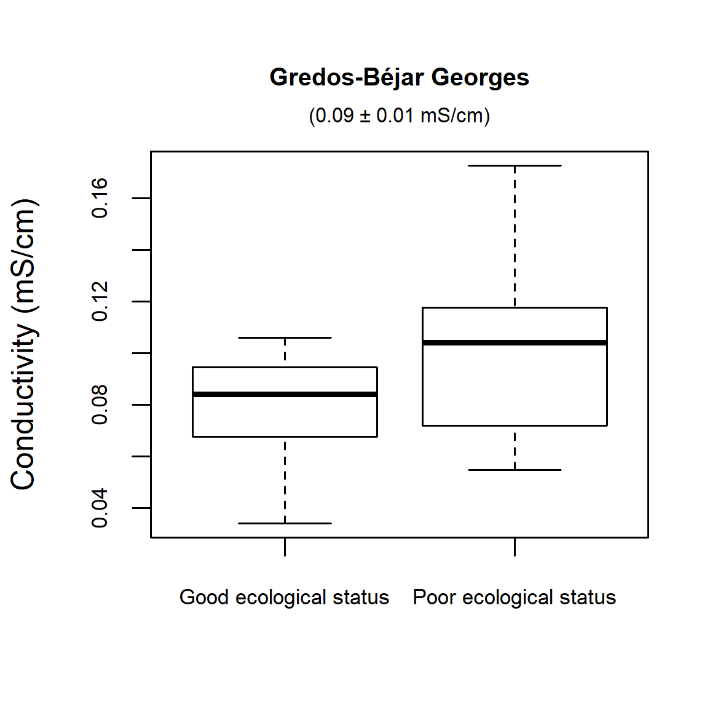

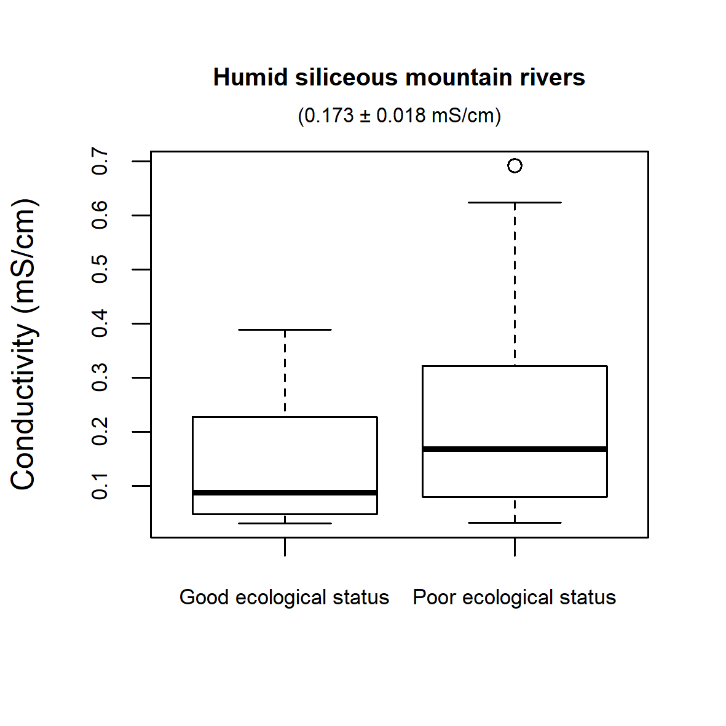


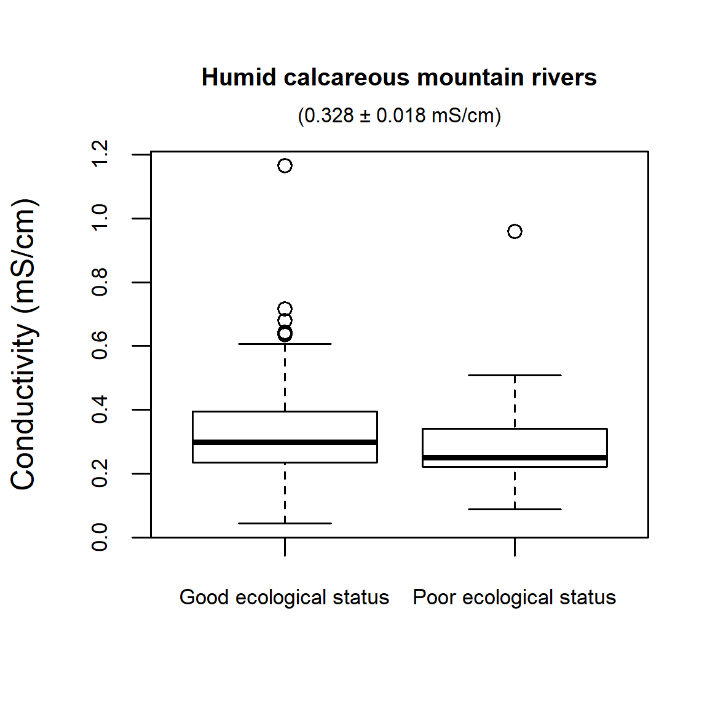

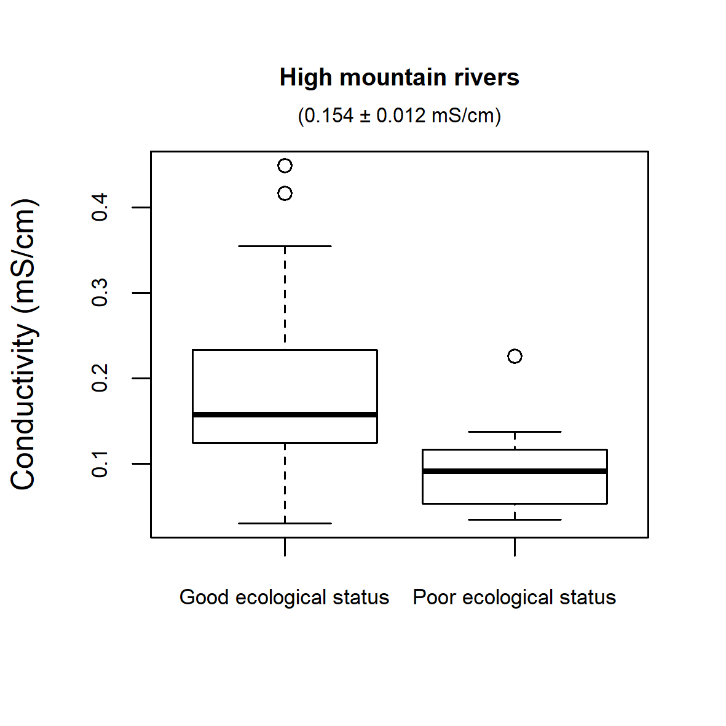


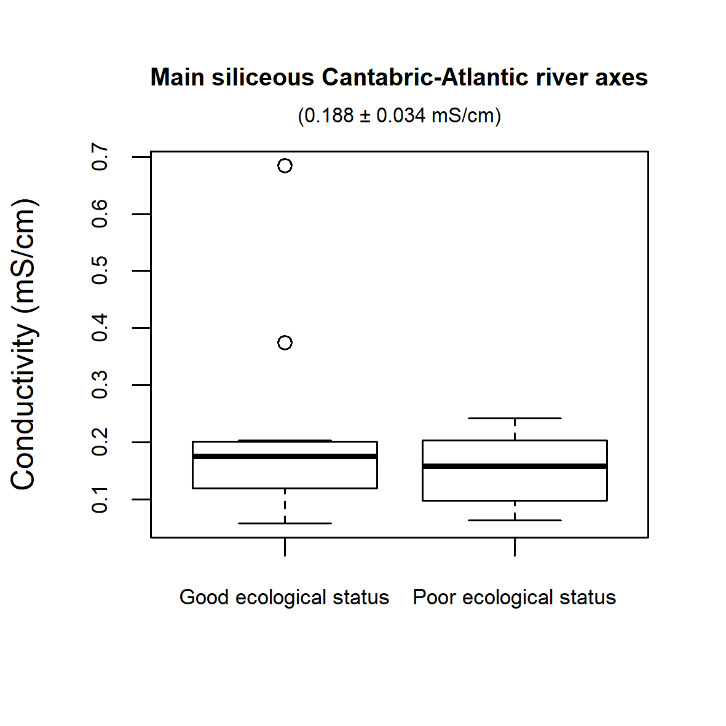

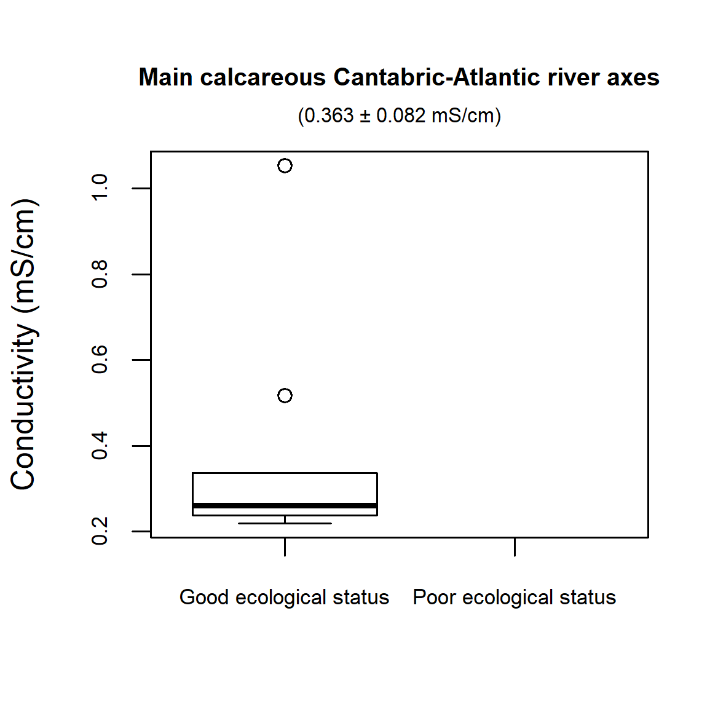


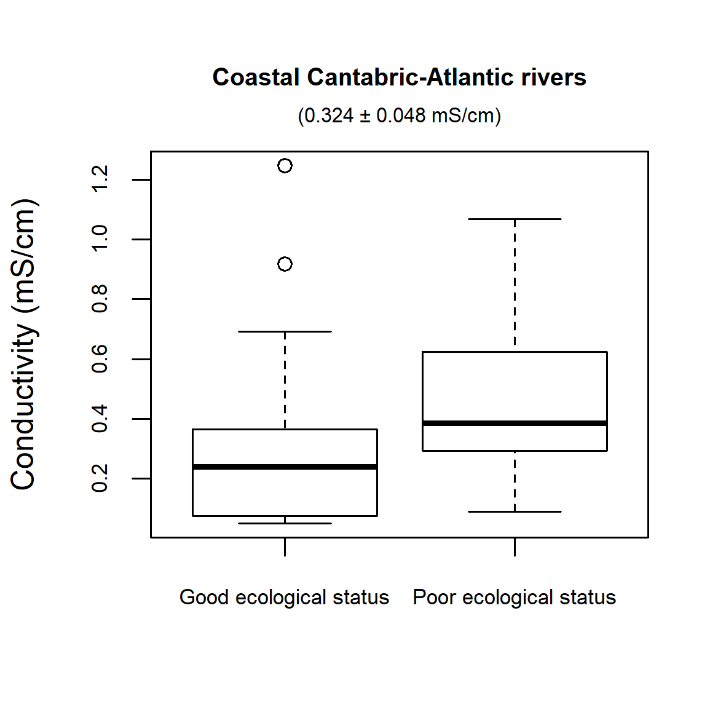

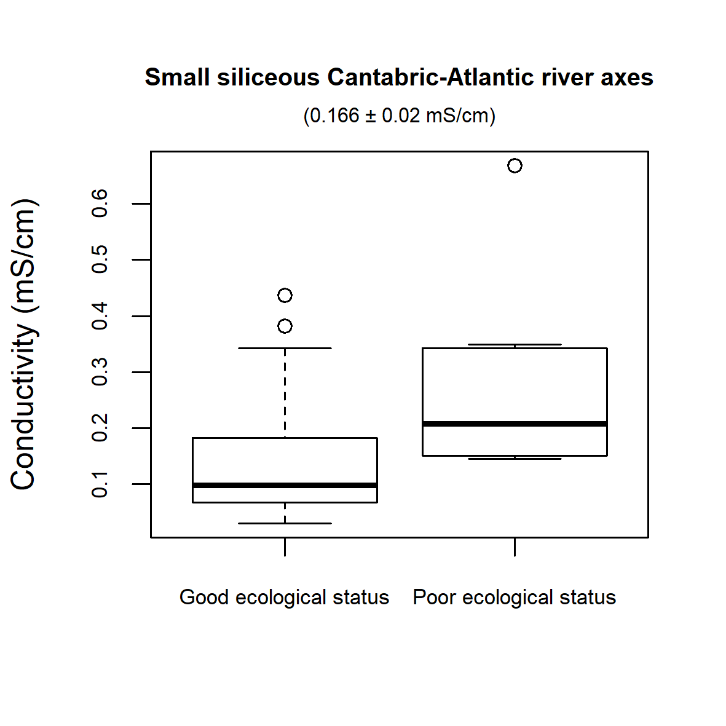


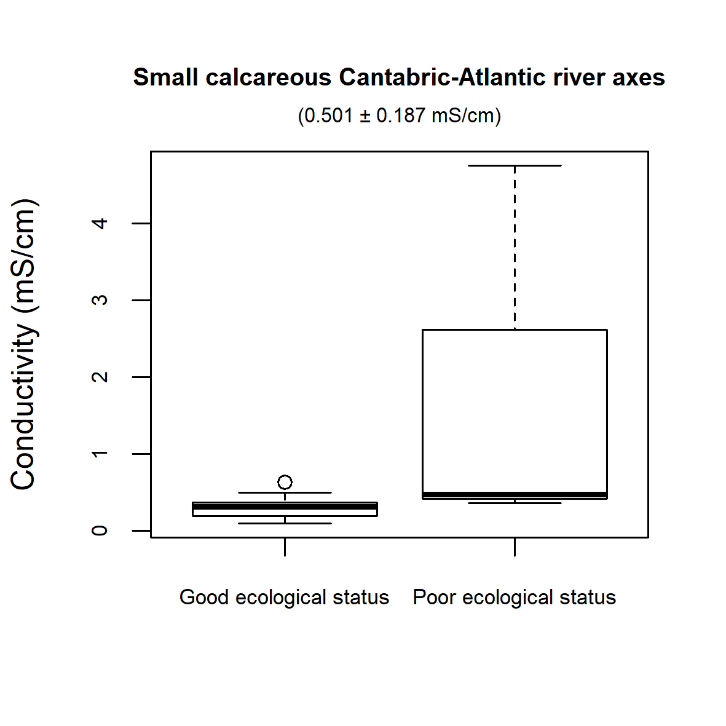

Supplement: Supplementary file 1 [file 13321352]
